# Supplementary material
Source: MDPI journal article supplement (https://www.mdpi.com/2227-7390/11/15/3315)
Supplement: s1 [file s1]

## Cuestionario Burnout Granada-University Students (CBG-USS)

### *EMOTIONAL EXHAUSTION*

1. El trabajo que realizo cada día en la Universidad, es más de lo que es posible hacer en un día completo
2. Estoy desbordado por mis estudios
3. Al final de un día de estudio y trabajo estoy agotado
4. Al iniciar cada día en la Universidad tengo la sensación de que nunca desconecto de mis estudios
5. Creo que ya no puedo más
6. Me cuesta iniciar cada jornada en la Universidad
7. Estoy quemado por mis estudios
8. Me siento cansado al realizar las tareas que me exigen mis estudios
9. Pienso que estudio y trabajo demasiado

### *DEPERSONALIZATION*

10. Me gusta compartir ciertos momentos de ocio con mis compañeros de estudios\*
11. Me gusta relacionarme con mis compañeros de estudios\*
12. Me preocupo por las personas con las que colaboro cada día en la Universidad\*
13. Sentirme cercano a mis compañeros facilita mi labor\*
14. Soy capaz de comprender a las demás personas\*
15. Soy capaz de comprender las emociones de las personas con las que comparto mi trabajo\*
16. Soy capaz de comprender las emociones de los compañeros de estudios\*

### *PERSONAL ACCOMPLISHMENT*

17. El tipo de trabajo que hago en clase y en mis estudios me frustra\*
18. Estoy harto de mis estudios\*
19. Al final de cada día me siento satisfecho con el trabajo realizado
20. Me gusta la carrera que he empezado a estudiar
21. Me siento orgulloso de mi trabajo como estudiante universitario
22. Me siento realizado en mis estudios
23. Mi trabajo en la universidad hace que me sienta importante
24. Mis estudios me decepcionan\*
25. Nada de lo que hago merece la pena\*
26. No he conseguido los logros que me había propuesto al iniciar mis estudios universitarios\*

### Scoring:

- 1 – Totalmente en desacuerdo
- 2 – En desacuerdo
- 3 – Neutral
- 4 – De acuerdo
- 5 - Totalmente de acuerdo

\* Items marked with an asterisk should be reversed before computing total scale scores of the CBG-USS.

The Cuestionario de Burnout Granada-University Students (CBG-USS) has been developed for the Spanish population. The items are freely available to researchers. In order to use them in other populations, a translation and validation study of the items must be carried out.
